# Supplementary material for: Chaenomeles Fructus (CF), the Fruit of Chaenomeles sinensis Alleviates IL-1β Induced Cartilage Degradation in Rat Articular Chondrocytes
Source: MDPI journal article supplement (doi:10.3390/ijms23084360), 2022-04-14

## Supplementary Information

Table S1. Identification and chemical characterization of chemical components authentically or tentatively in the water extracts from *Chaenomeles sinensis* fruit using LC-ESI-QTOF MS/MS

| No.      | Identified or proposed compound | Formula   | mass (Da) | Expected RT (min) | Adduct             | Found at mass (Da) | Error (ppm) |
|----------|---------------------------------|-----------|-----------|-------------------|--------------------|--------------------|-------------|
| 6        | gallic acid                     | C7H6O5    | 170.0215  | 2.71              | [M-H] <sup>-</sup> | 169.0144           | 0.7         |
| 7        | vanillic acid                   | C8H8O4    | 168.0423  | 3.34              | [M-H] <sup>-</sup> | 167.0349           | -0.2        |
| <b>1</b> | <b>protocatechuic acid</b>      | C7H6O4    | 154.0266  | 3.86              | [M-H] <sup>-</sup> | 153.0195           | 0.9         |
| 8        | Neochlorogenic acid             | C16H18O9  | 354.0951  | 4.02              | [M-H] <sup>-</sup> | 353.0875           | -0.9        |
| 9        | Procyanidin dimer 1             | C30H26O12 | 578.1424  | 4.06              | [M-H] <sup>-</sup> | 577.1347           | -0.7        |
| 10       | catechin                        | C15H14O6  | 290.0790  | 4.69              | [M-H] <sup>-</sup> | 289.0717           | -0.2        |
| 11       | Procyanidin dimer 2             | C30H26O12 | 578.1424  | 4.85              | [M-H] <sup>-</sup> | 577.1347           | -0.7        |
| 12       | chlorogenic acid                | C16H18O9  | 354.0951  | 5.00              | [M-H] <sup>-</sup> | 353.0876           | -0.7        |
| 13       | Cryptochlorogenic acid          | C16H18O9  | 354.0951  | 5.01              | [M-H] <sup>-</sup> | 353.0876           | -0.7        |
| 14       | epicatechin                     | C15H14O6  | 290.0790  | 5.67              | [M-H] <sup>-</sup> | 289.0718           | 0.1         |
| 15       | syringic acid                   | C9H10O5   | 198.0528  | 6.13              | [M-H] <sup>-</sup> | 197.0455           | -0.3        |
| 16       | Procyanidin dimer 3             | C30H26O12 | 578.1424  | 6.48              | [M-H] <sup>-</sup> | 577.1350           | -0.2        |
| 17       | Glucopyranosyl-coumaric acid    | C18H28O10 | 403.1605  | 6.62              | [M-H] <sup>-</sup> | 403.1606           | 0.3         |
| <b>2</b> | <b>Quercetin</b>                | C15H10O7  | 302.0427  | 9.00              | [M-H] <sup>-</sup> | 301.0352           | -0.6        |
| <b>3</b> | <b>Luteolin</b>                 | C15H10O6  | 286.0477  | 9.30              | [M-H] <sup>-</sup> | 285.0402           | -0.9        |
| 18       | Betulinic acid                  | C30H48O3  | 456.3603  | 23.34             | [M-H] <sup>-</sup> | 455.3531           | 0.1         |
| <b>4</b> | <b>Oleanolic acid</b>           | C30H48O3  | 456.3603  | 25.82             | [M-H] <sup>-</sup> | 455.3527           | -0.8        |
| <b>5</b> | <b>Ursolic acid</b>             | C30H48O3  | 456.3603  | 26.41             | [M-H] <sup>-</sup> | 455.3523           | -1.8        |

Figure S1. The extracted ion chromatograms (XICs) of 18 characterized peaks including five components identified with reference standards in the water extract were obtained and identified tentatively using LC-ESI-QTOF MS/MS analysis in negative ion mode

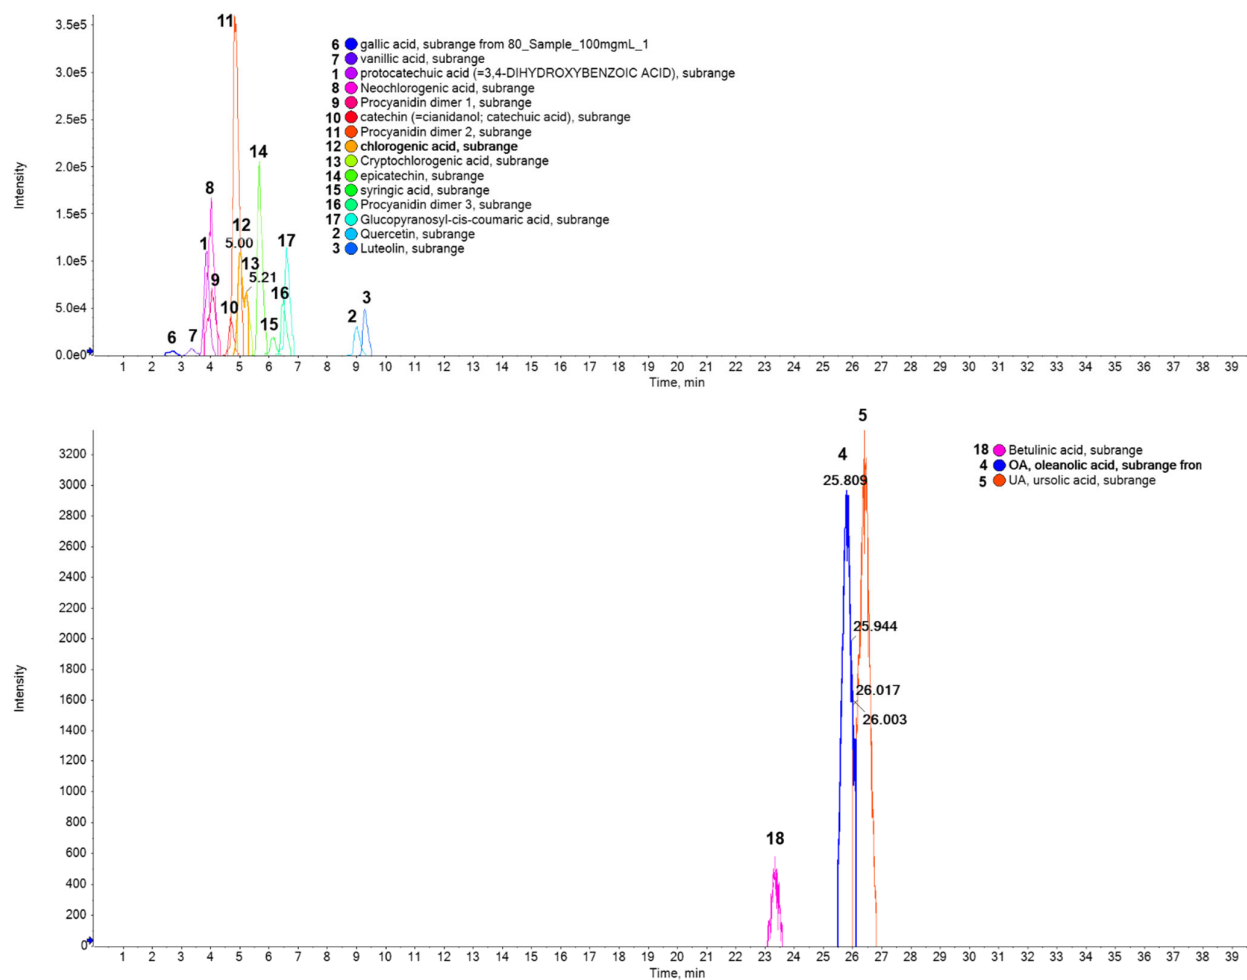

Supplement: s1 [file s1]
